# Supplementary material
Source: PubMed Central journal article supplement (PMC5718105)

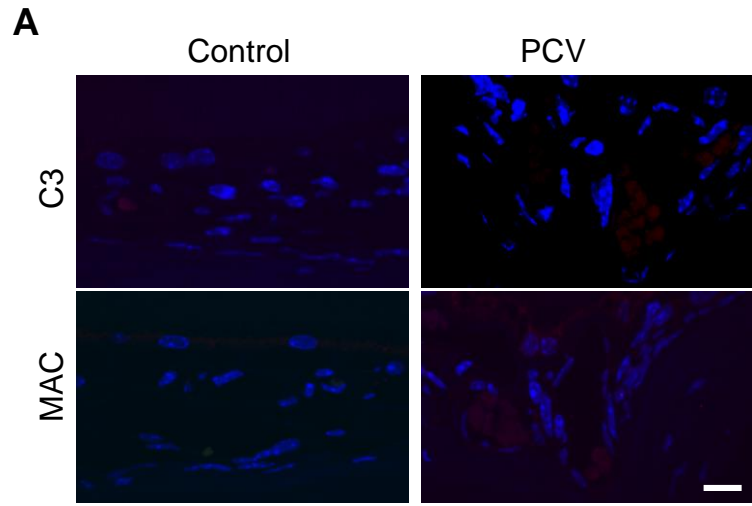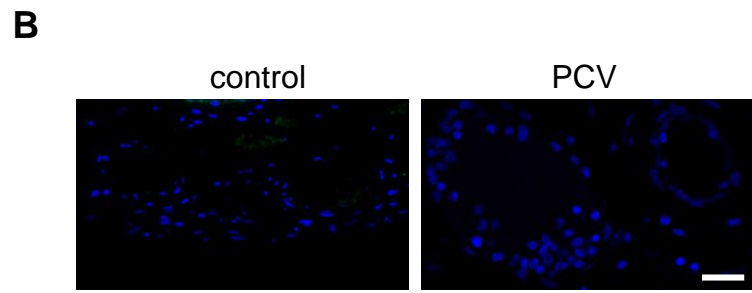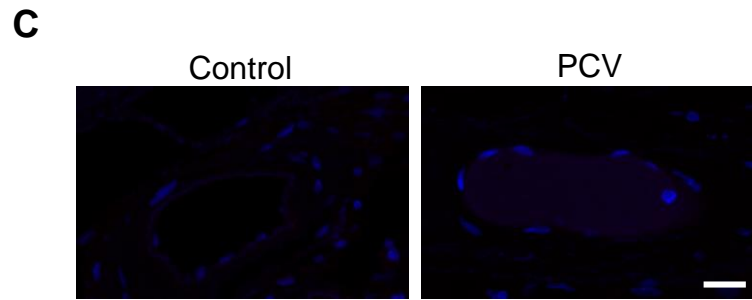

Supplement: mmc1.pdf [file mmc1.pdf]

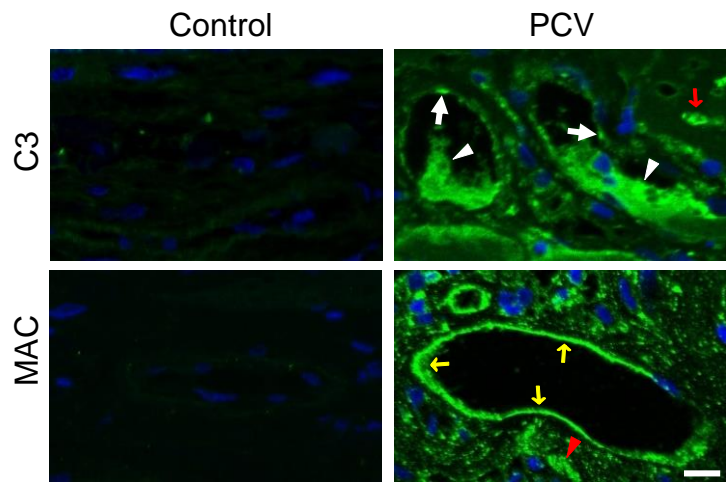

Supplement: mmc10.pdf [file mmc10.pdf]

**A**

Uninjected

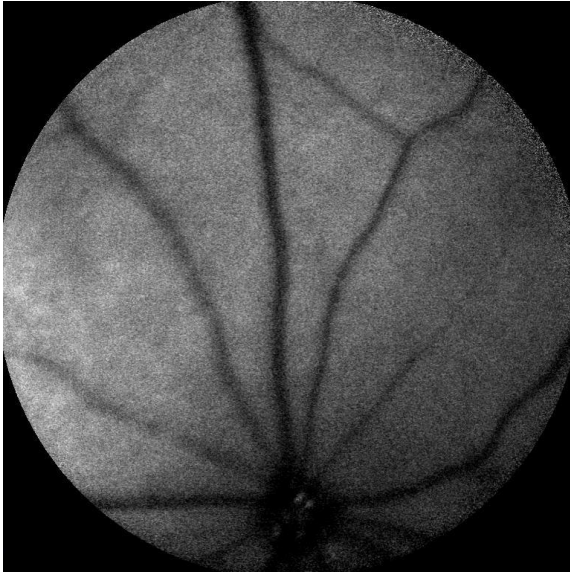

NP+coumarin

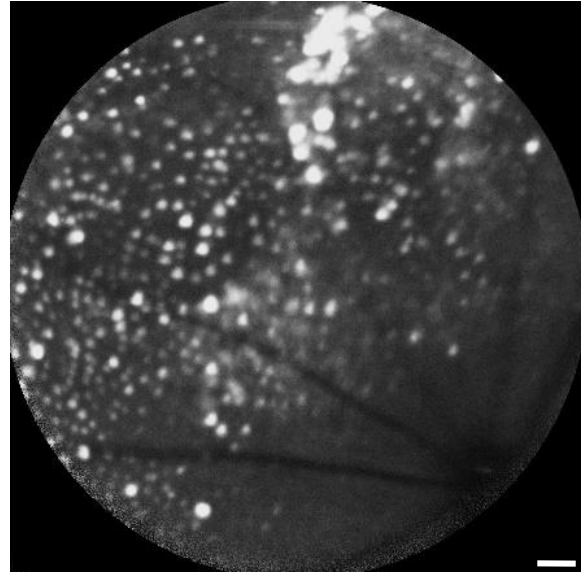

**B**

Control

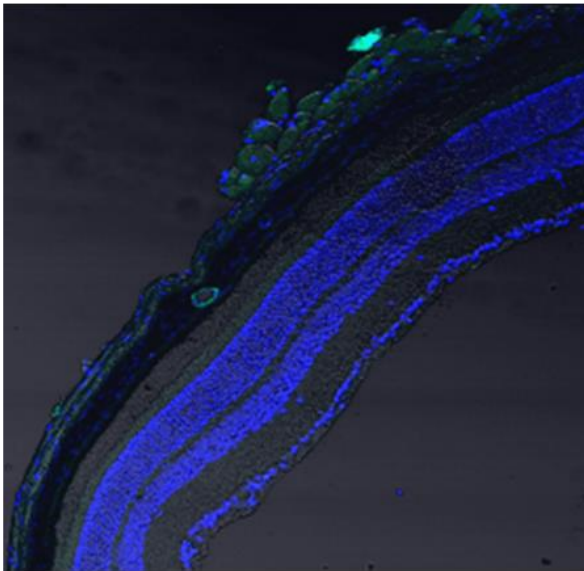

NP+coumarin

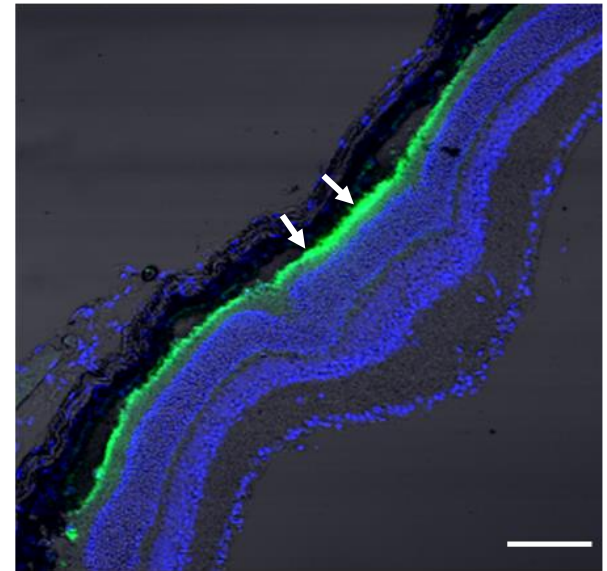

Supplement: mmc11.pdf [file mmc11.pdf]

**A**

Control

PCV

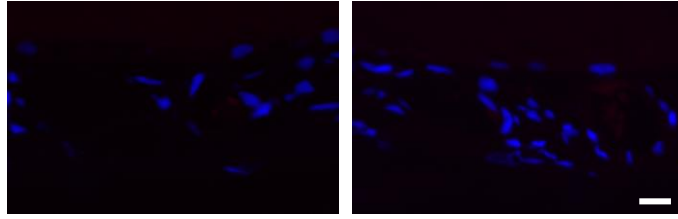

**B**

Control

PCV

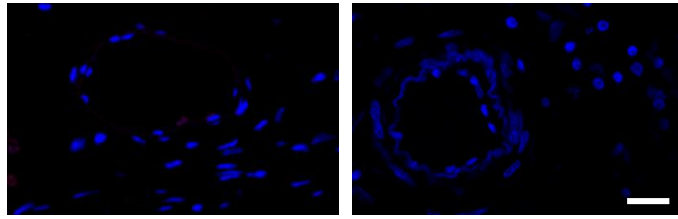

Supplement: mmc2.pdf [file mmc2.pdf]

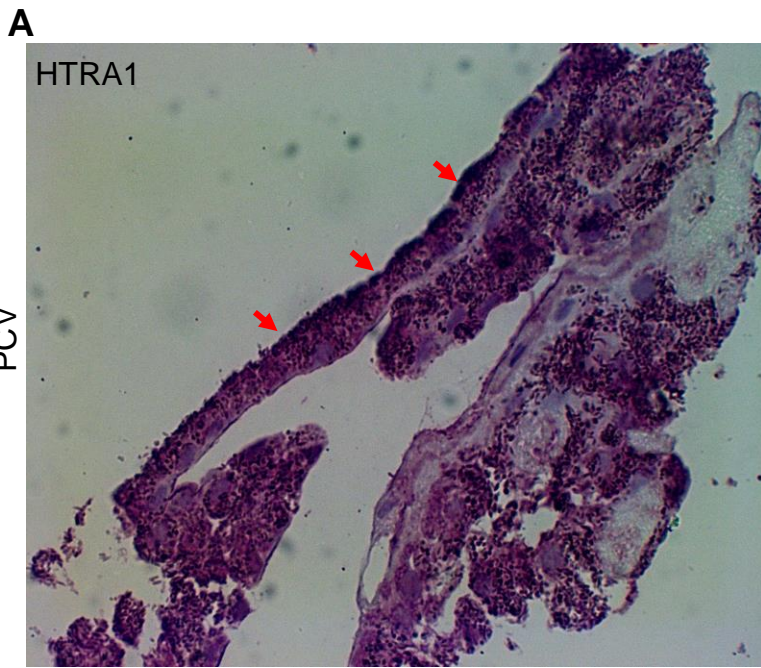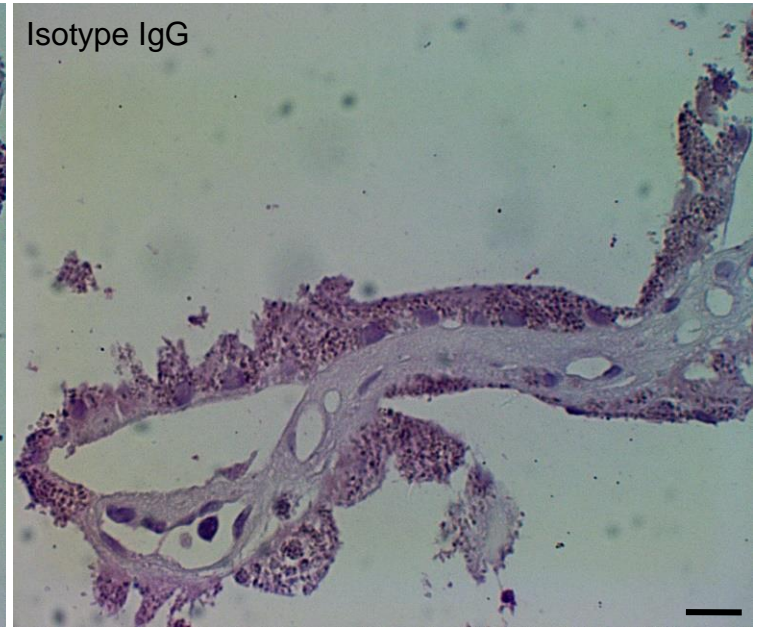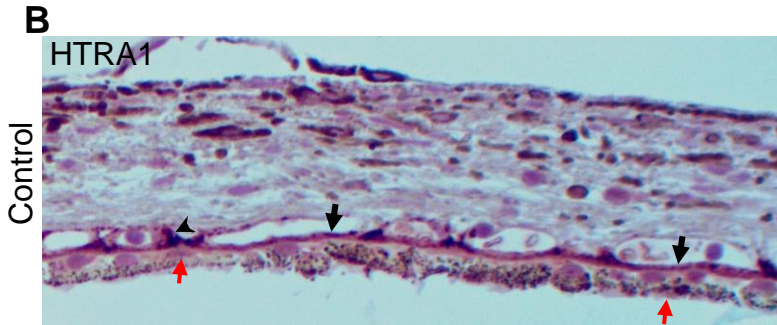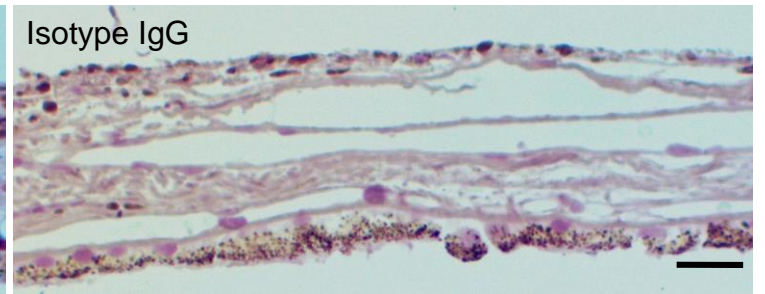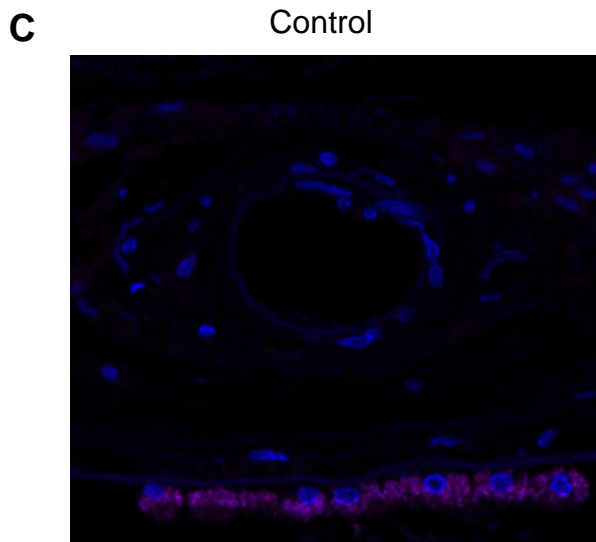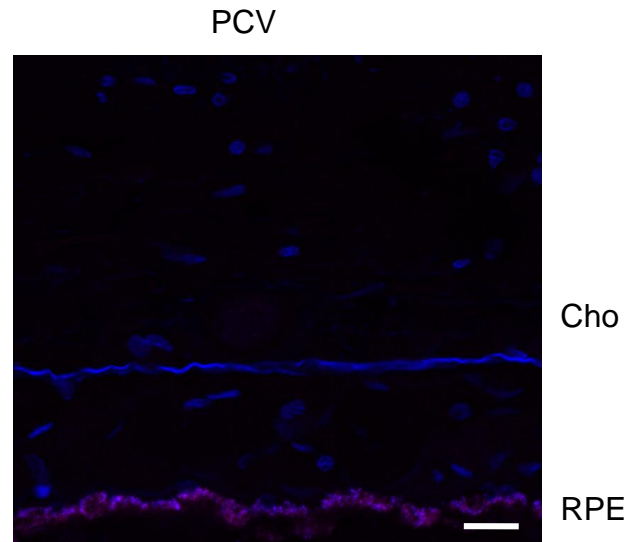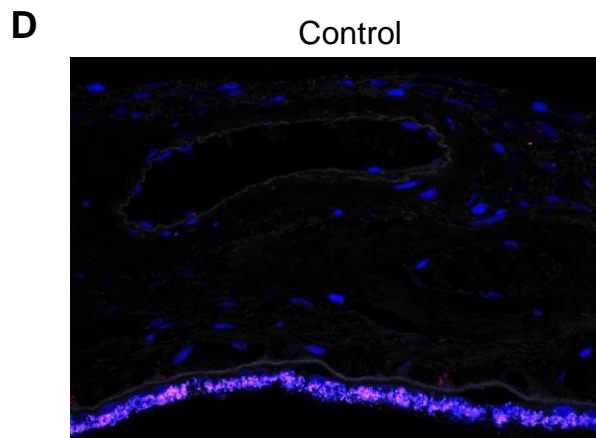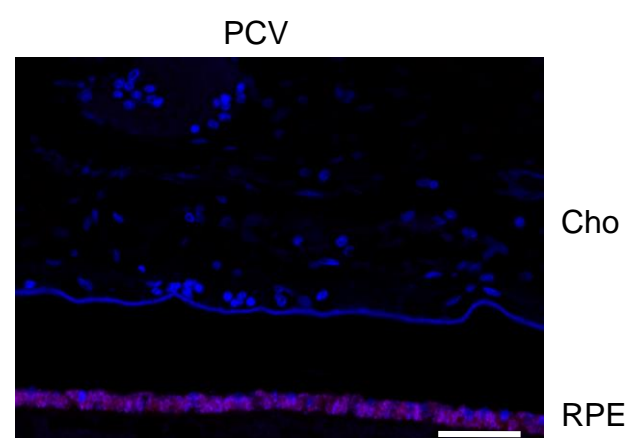

Supplement: mmc3.pdf [file mmc3.pdf]

**A**

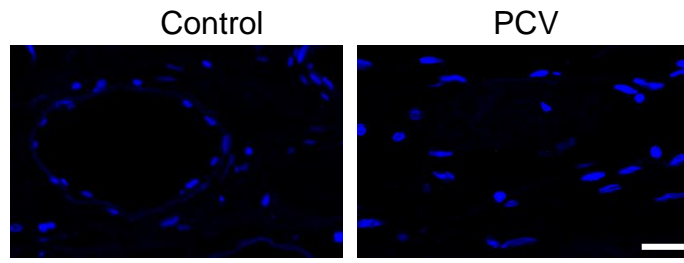

**B**

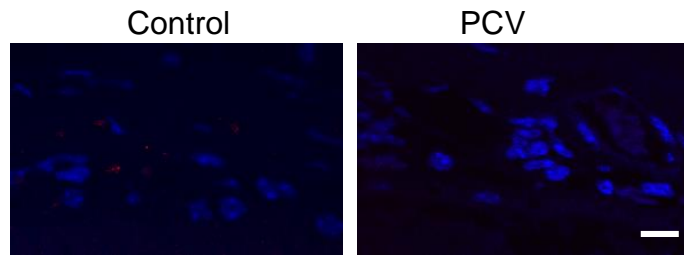

Supplement: mmc4.pdf [file mmc4.pdf]

**A**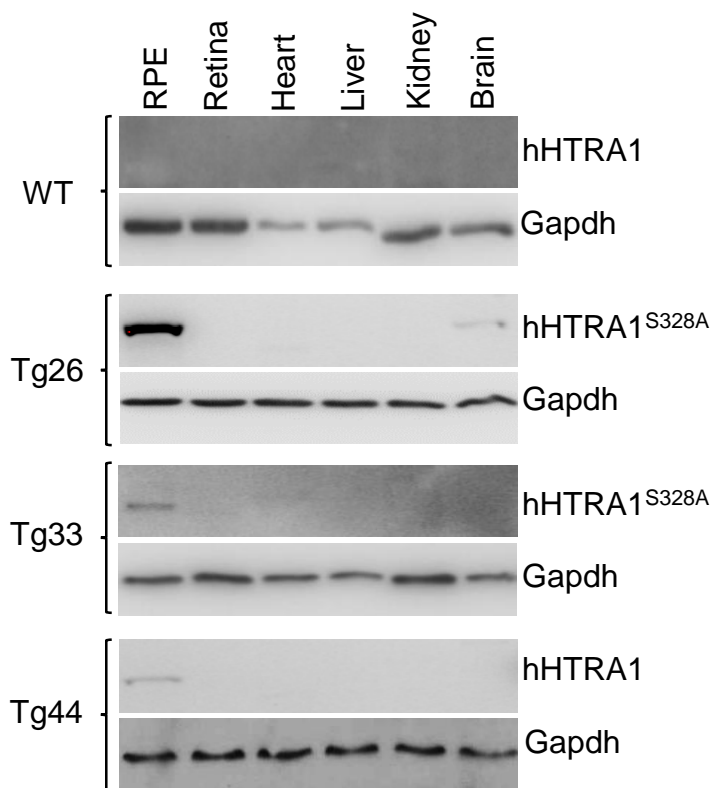**B**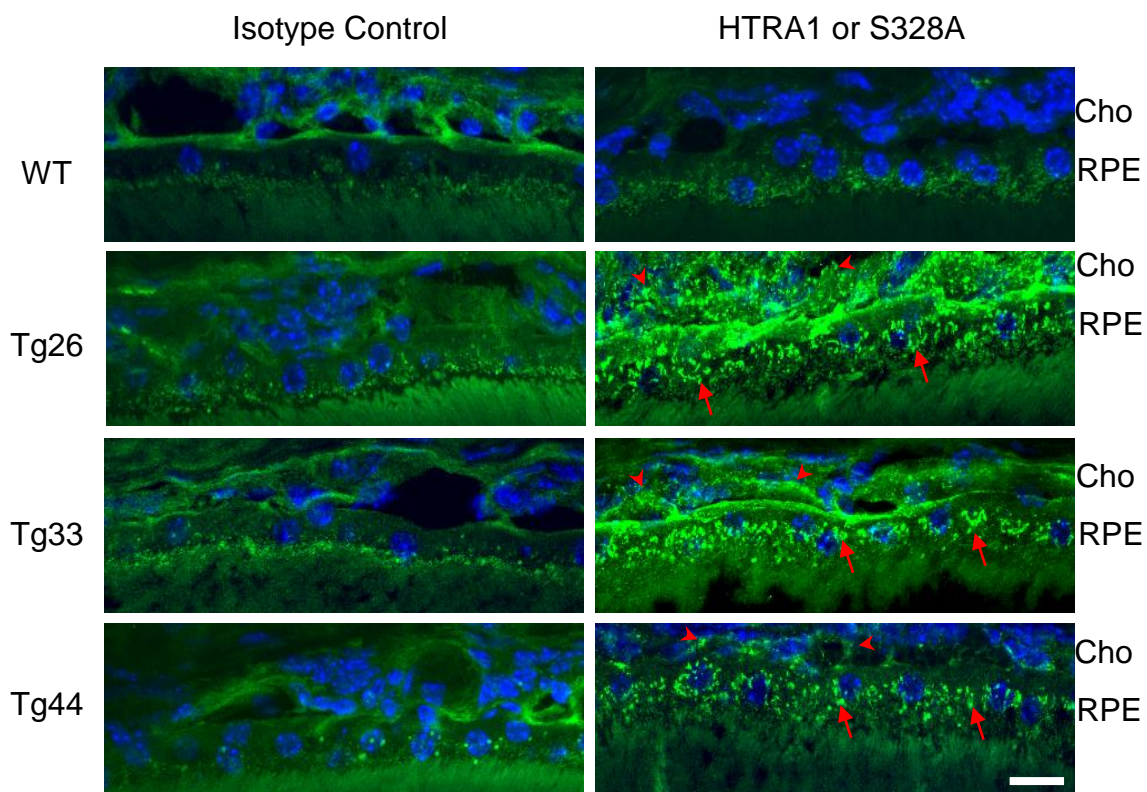

Supplement: mmc5.pdf [file mmc5.pdf]

**A**

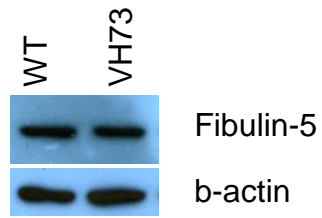

**B**

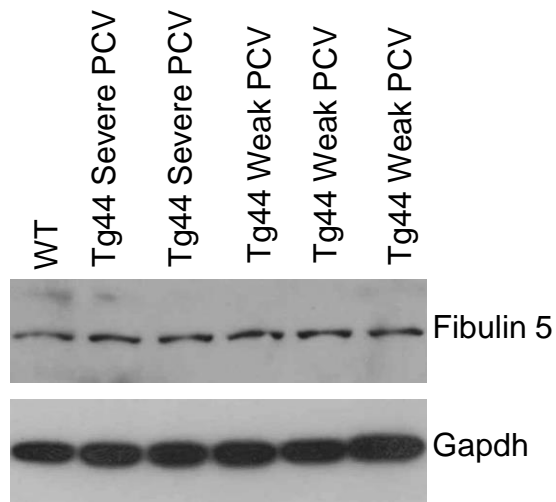

Supplement: mmc6.pdf [file mmc6.pdf]

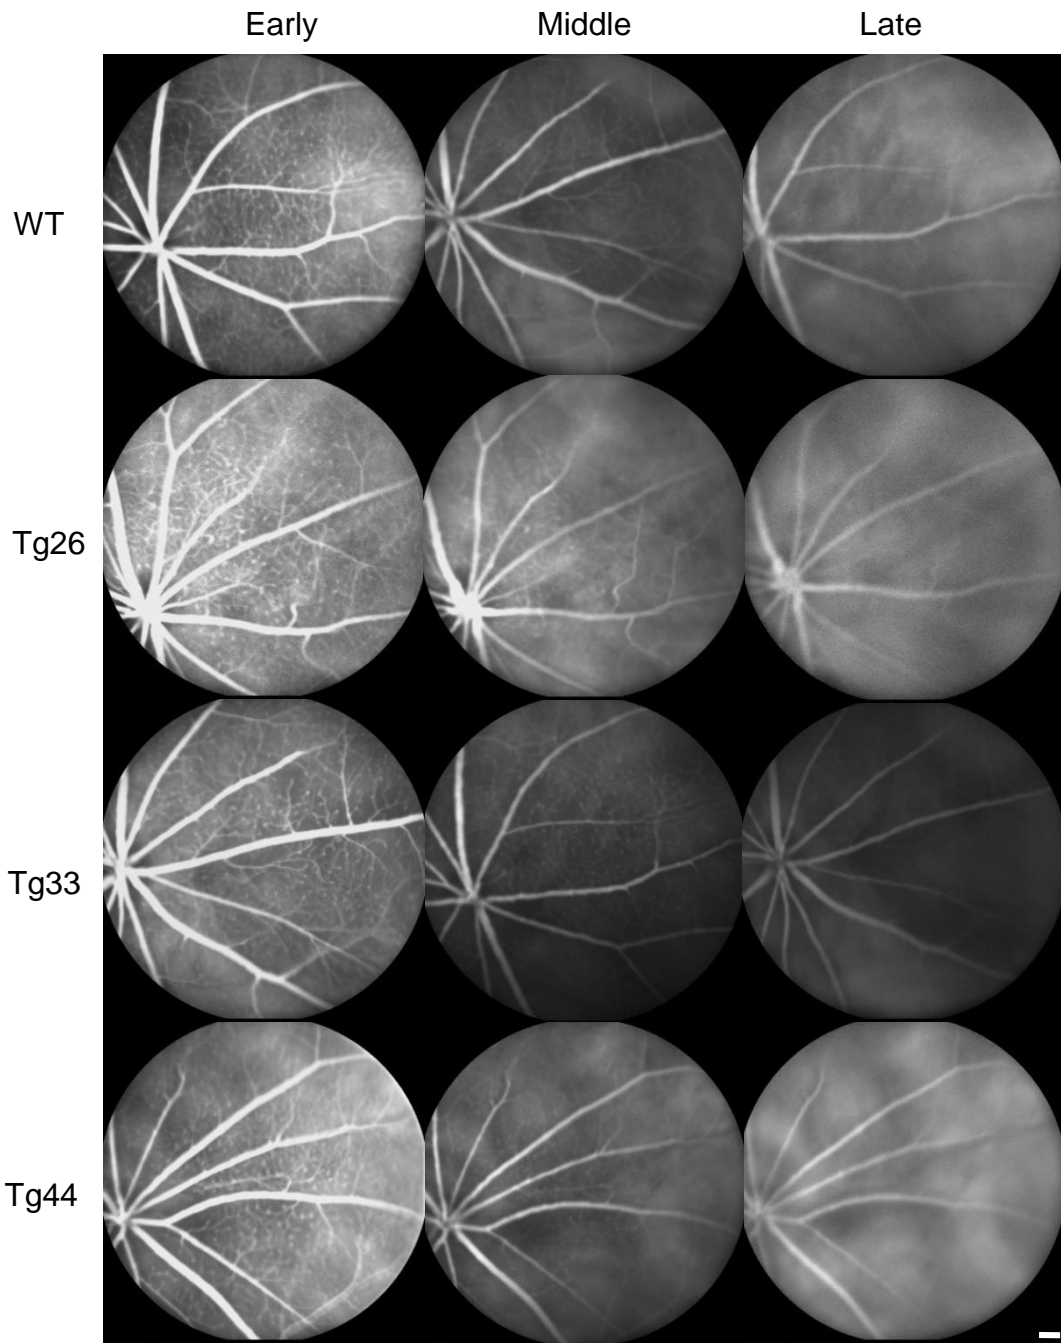

Supplement: mmc7.pdf [file mmc7.pdf]

**A**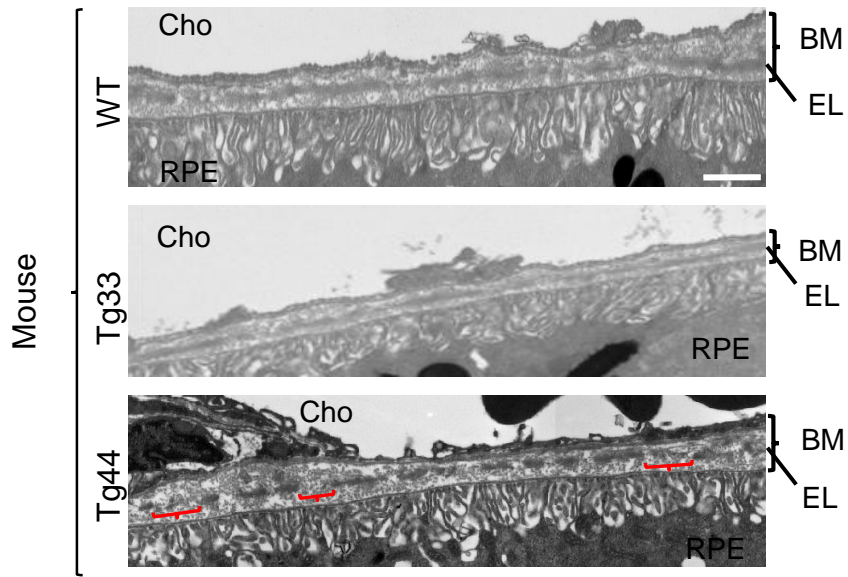**B**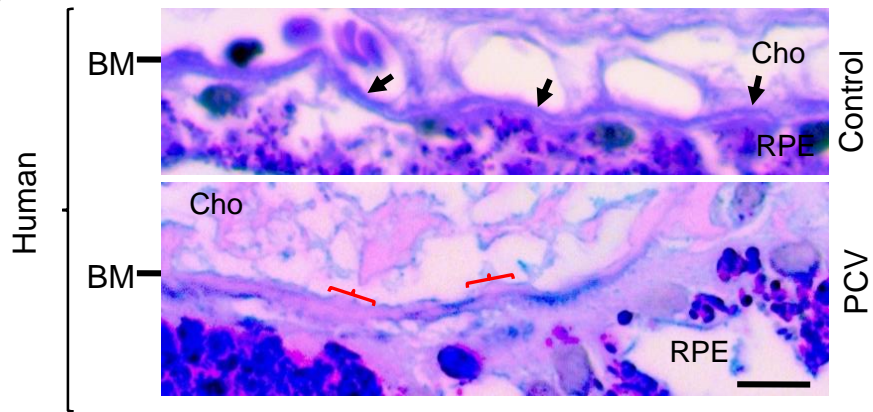

Supplement: mmc8.pdf [file mmc8.pdf]

WT

Tg26

Tg33

Tg44

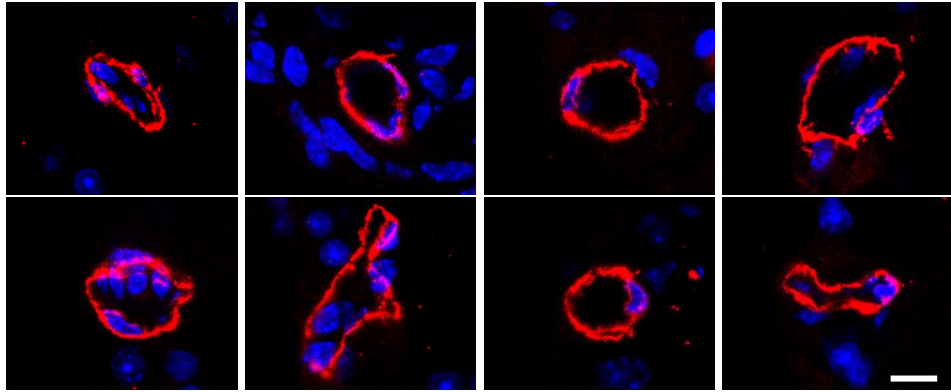

Supplement: mmc9.pdf [file mmc9.pdf]
